# **Title: Time series metagenomic sampling of the Thermopyles, Greece, geothermal springs reveals stable microbial communities dominated by novel sulfur-oxidizing chemoautotrophs**

**Meziti A.<sup>1,2\*</sup>, Nikouli E<sup>1,2</sup>., Hatt J.K.<sup>2</sup>, Konstantinidis K.<sup>2,3</sup>, Kormas K. Ar<sup>1</sup>.**

<sup>1</sup> Department of Ichthyology and Aquatic Environment, University of Thessaly, 38446 Volos, Greece

<sup>2</sup> School of Civil and Environmental Engineering, Georgia Institute of Technology, Ford Environmental Science & Technology Building, 311 Ferst Drive, Atlanta, GA 30332

<sup>3</sup> School of Biological Sciences, Georgia Institute of Technology, Ford Environmental Sciences & Technology Building, 311 Ferst Drive, Atlanta, GA 30332.

## **\*Correspondence to**

**Alexandra Meziti**

Department of Ichthyology and Aquatic Environment, University of Thessaly,  
38446 Volos, Greece

Phone: (+30) 242-109-3240

E-mail: ameziti@uth.gr

## 32 Abstract

Geothermal springs are barely affected by environmental conditions aboveground as they  
 34 are continuously supplied with subsurface water with little variability in chemistry.  
 Therefore, changes in their microbial community composition and function, especially over  
 36 a long period, are expected to be limited but this assumption has not yet been rigorously  
 tested. Toward closing this knowledge gap, we applied whole metagenome sequencing to  
 38 17 water samples collected between 2010 and 2016 (two to four samples per year) from  
 the Thermopyles sulfur geothermal springs in central Greece. As revealed by 16S rRNA  
 40 gene fragments recovered in the metagenomes, *Epsilonproteobacteria*-related operational  
 taxonomic units (OTUs) dominated most samples, while grouping of samples based on OTU  
 42 abundances exhibited no apparent seasonal pattern. Similarities between samples  
 regarding functional gene content were high, especially in comparison to other surface  
 44 water systems in Greece, with all samples sharing >70% similarity in functional pathways.  
 These community-wide patterns were further confirmed by analysis of metagenome-  
 46 assembled genomes (MAGs), which showed -in addition- that novel species and genera of  
 the chemoautotrophic *Campylobacterales* order dominated the springs. These MAGs carried  
 48 different pathways for thiosulfate and/or sulfide oxidation coupled to carbon fixation  
 pathways. Overall, our study showed that even in the long term, functions of microbial  
 50 communities in a moderately hot terrestrial spring remain stable, driving presumably the  
 corresponding stability in community structure.

52

Keywords: Whole metagenome sequencing, geothermal springs, microbial communities,  
 54 functional diversity, sulfur metabolism

56

## INTRODUCTION

Microbial communities of geothermal springs are of special interest for understanding early life as they are considered analogues of the first habitable environments on Earth (Damer & Deamer, 2019; Konhauser, Phoenix, Bottrell, Adams, & Head, 2001). These habitats are dominated by several thermophilic and hyperthermophilic species (López-López, Cerdán, & González-Siso, 2013) that mediate nutrient cycling (e.g., C, N, S) (Falkowski, Fenchel, & Delong, 2008). The best-studied geothermal habitat is the Yellowstone National Park (USA) which contains >14,000 of sites with geothermal activity, covering a wide range of pH (2–10), temperature (40–92°C), and geochemical properties (Rye & Truesdell, 2007). Most of these sites exhibit temporal stability in these geochemical properties (Inskeep et al., 2013).

Several molecular studies of the microbial diversity present in Yellowstone Park have revealed the dominance of uncultivated thermophilic archaea, *Aquificales* and *Cyanobacteria* at different sites (Barns, Fundyga, Jeffries, & Pace, 1994; Barns, Delwiche, Palmer, & Pace, 1996; Boomer, Lodge, Dutton, & Pierson, 2002; Hugenholtz, Pitulle, Hershberger, & Pace, 1998; Meyer-Dombard, Shock, & Amend, 2005; Reysenbach et al., 2006; Toplin, Norris, Lehr, McDermott, & Castenholz, 2008). Subsequent studies, including a large metagenomic survey (Inskeep et al., 2013), tried to elucidate the geochemical features that drive microbial diversity patterns and how specific phylotypes are functionally differentiated from each other based on electron donors such as hydrogen or sulfide and electron acceptors. Other habitats that have been studied, including thermophilic springs in Japan (Yamamoto et al., 1998), Iceland (Flores, Liu, Ferrera, Beveridge, & Reysenbach, 2008; Takacs-Vesbach, Mitchell, Jackson-Weaver, & Reysenbach, 2008; Tobler & Benning, 2011), New Zealand (Childs, Mountain, O'Toole, & Stott, 2008) and Kamchatka (Russia; Burgess, Unrine, Mills, Romanek, & Wiegel, 2012; (Wilkins, Ettinger,

82 Jospin, & Eisen, 2019) were found to harbor similar microbial communities. Most of these  
habitats exhibit high temperatures (>65 °C), and thus mainly consist of hyperthermophilic  
84 communities.

Mesophilic sulfur-rich terrestrial springs, in particular, are comparatively much less  
86 studied and understood. Chemoautotrophic microbial communities use reduced sulfur  
compounds contained in underlying geothermal water to gain energy and fuel these  
88 systems. These communities are important in sulfur cycling and carbon fixation, thus  
mediating the transfer of energy from the geothermal source to other trophic levels  
90 (Hügler, Gärtner, & Imhoff, 2010). Most studies of mesophilic terrestrial springs have  
analyzed microbial community diversity and/or functions in order to detect key community  
92 members and the functions performed in association with environmental and/or  
geothermal parameters (Chan, Chan, Tay, Chua, & Goh, 2015; Engel, Porter, Stern, Quinlan,  
94 & Bennett, 2004; Headd & Engel, 2013; Reigstad, Jorgensen, Lauritzen, Schleper, & Urich,  
2011). However, although steady geochemical conditions imply stability in microbial  
96 diversity and function, no study has been performed on a temporal or seasonal scale.  
Temporal analysis is particularly important for mesophilic springs since these systems  
98 typically receive soil or water inputs from other sources (i.e., seawater or rainfall), in  
addition to groundwater. It currently remains unknown whether these inputs could  
100 influence major metabolic pathways and override the major input from geothermal fluids.

Greece harbors many terrestrial springs due to the geology of the country. The  
102 formation of terrestrial springs is related to recent volcanic activity and active tectonics for  
which magmatic and volcanic processes along with the high mountain chains and active  
104 fault systems favor the rise of deep waters discharged at the surface as geothermal springs.  
Most springs are characterized by the mixing of deep thermal reservoir water with  
106 meteoric water, while coastal springs are also characterized by the mixing of geothermal

water with seawater and/or freshwater, and thus losing their heat.

The Thermopyles springs located in the eastern part of mainland Greece (38°47'36.35"N/ 22°31'43.04"E) consist of such typical coastal springs and comprise one of the larger active geothermal systems in Greece. They are part of the Spercheios tectonic graben, which is considered to be an extension of the Anatolia strike-slip fault (Georgalas and Papakis, 1966, Marinos, Frangopoulos, & Stournaras, 1973). The activity of trending faults contributes to the uprise of thermal water, which specifically for the Thermopyles springs mixes with seawater or freshwater resulting in lower temperatures, compared to other geothermal springs, close to 40 °C. (Duriez et al., 2008). The system is rich in ammonia and hydrogen sulfide produced by the reduction of sulfate originating from the oxidation of sulfide minerals or directly from seawater (Lambrakis, Katsanou, & Siavalas, 2014).

Very few studies have been conducted in the Thermopyles and these were focused on geochemical features and measurements of physicochemical properties (Duriez et al., 2008; Lambrakis & Kallergis, 2005; Lambrakis et al., 2014; Verros et al., 2007; Zarikas et al., 2014) or the investigation of travertine deposits in association with *Cyanobacteria* (Kanellopoulos, Lamprinou, Mitropoulos, & Voudouris, 2016). Investigation of geochemical features has shown the increased concentration of hydrogen sulfide mainly produced by pyrite oxidation and reduced species of sulfates (Duriez et al., 2008; Lambrakis & Kallergis, 2005). The microbial community of Thermopyles has only been studied once (Kormas, Tamaki, Hanada, & Kamagata, 2009) but this previous study was focused on a cross-sectional comparison of populations to those in springs in other parts of Greece and was based on clone libraries that provided only coarse resolution.

Here we analyze shotgun metagenomes from 17 Thermopyles samples collected during a seven-year period and in different seasons along with environmental data in order

to evaluate i) potential seasonal changes in microbial diversity and function, ii) the novelty of the microbial species that are always prevalent in the community using 16S rRNA and metagenome assembled genomes (MAGs), and iii) key metabolic functions that fuel the microbial communities in terms of energy and carbon sources for further biotechnological applications. Our findings suggested that seasonal and temporal changes were not significant in shaping microbial community composition and function while microbial communities were characterized by several novel species that have a key role in habitat function.

## MATERIALS AND METHODS

**Sample collection and processing.** Samples were collected from the Thermopyles geothermal springs from June 2010 until December 2016 (Table S1). Water samples of 5 l were collected in pre-sterilized dark polyethylene bottles from a seepage point with visual water flow and bubbling. Upon return to the lab and within 3 hours, each sample was pre-filtered through a sterile 180 µm mesh nylon filter (Millipore, Burlington, MA, USA) to exclude sampling of microorganisms attached to large particles, and then a volume of 1.8 – 4.5 l of filtrate from the pre-filtration was filtered under mild vacuum (<100 mm Hg) through a 0.2 µm isopore polycarbonate filter (Sartorius, Göttingen, Germany) to collect microbial biomass. Subsequently, filters were folded aseptically, placed in sterile cryovials and stored at -80°C until further processed. *In situ* measurements, including temperature, pH and conductivity (Table S1), were taken by a portable multisensor instrument (WTW/Xylem, Rye Brook, NY, USA). Subsamples of 10-15 ml were fixed with 2% formaldehyde final concentration and kept at 4°C in the dark for cell counts. These subsamples were filtered to black Nuclepore filters (pore size of 0.2 µm) and stained with DAPI (4',6-diamidino-2-phenylindole)(0.1 ug/ml). DNA extraction was performed with the

MoBio Power Soil kit (MoBio Inc. Carlsbad, CA, USA) following its standard protocol. For all samples, libraries were prepared using the Illumina Nextera XT DNA library prep kit according to manufacturer's instructions, except that the protocol was terminated after isolation of cleaned double stranded libraries. An equimolar mixture of the libraries was sequenced on an Illumina HiSeq 2500 instrument (High Throughput Sequencing Core, Georgia Institute of Technology) for 300 cycles (2 x 150 bp paired-end rapid run). Adapter trimming and demultiplexing of sequenced samples was carried out by the instrument.

**Metagenomic read sequence trimming and assembly.** Illumina reads were trimmed using a Q = 20 Phred quality score cut-off using SolexaQA ++ (Cox, Peterson, & Biggs, 2010) and only trimmed reads longer than 50bp were considered for further analysis. Metagenomic reads were assembled using IDBA with default settings for metagenomes (Peng, Leung, Yiu, & Chin, 2012). Protein-coding genes were predicted from contigs longer than 500bp using MetaGeneMark.hmm with default parameters (Zhu, Lomsadze, & Borodovsky, 2010). Sequencing and assembly statistics for the metagenomic datasets are provided in Table 1. Metagenomic datasets have been deposited in NCBI SRA under the bioproject PRJNA611516.

Metagenomic read encoding fragments of the 16S rRNA gene were identified with Parallel-META (v.2.1) (Su, Xu, & Ning, 2012), and were subsequently processed for OTU picking (>97% sequence identity threshold) and taxonomic identification with SILVA128 database (Pruesse et al., 2007) using MacQIIME 1.8.0 with default parameters (Caporaso et al., 2010).

**Population genome binning.** Contigs longer than 500 bp were binned into MAGs using MaxBin v2.1.1 with default settings (Wu, Tang, Tringe, Simmons, & Singer, 2014). In each binning run, only contigs from the assembly of an individual sample were used (no co-assembly was performed). CheckM and the MiGA webserver ([www.microbial-genomes.org](http://www.microbial-genomes.org))

were used to estimate completeness and contamination of each MAG based on the recovery of single-copy universal bacterial proteins (Parks, Imelfort, Skennerton, Hugenholtz, & Tyson, 2015; Rodriguez-R et al., 2018). Recruitment plots and coverage for MAG contigs and genes were calculated using the 'enveomics.R' package v1.4.1 from the Enveomics Collection (Rodriguez-R & Konstantinidis, 2016). Final MAGs are available through: <http://enve-omics.ce.gatech.edu/data/> and in NCBI SRA under the bioproject PRJNA611516. Relative abundance of MAGs was calculated as  $100 \times \text{MAG coverage} \times (\text{MAG}_{\text{size}}(\text{bp}) / \text{Metagenome}_{\text{size}}(\text{bp}))$ . Taxonomy of the MAGs was estimated by MiGA with the NCBI Genome (Prokaryotes) and TypeMAT databases containing all quality controlled genomes from prokaryotic type material contained in NCBI until June 2020 (MiGA online; June 2020). Genomes were also classified using GTDB-tk in order to also include previously published MAGs for comparisons (Chaumeil, Mussig, Hugenholtz, & Parks, 2020). [MAGs naming scheme: the first part reflects the closest relative of the MAG and the second part the lowest taxonomic rank the two share according to the MiGA TypeMAT/NCBI database ( $p < 0.1$ ), i.e., C:class, O:order, F:family, G:Genus, S:Species. For instance, we use *Sulfurimonas\_O* for a MAG that had a *Sulfurimonas* sp. as the closest relative and was classified -at the lowest level with statistical confidence- to the order *Campylobacteriales*].

***Functional annotation of predicted genes and determination of differentially abundant features.*** The predicted protein sequences encoded in the MAGs and the assembled contigs were searched against uniprot-TrEMBL(2018) to assign functional annotation based on best matches, and  $\geq 40\%$  similarity,  $\geq 60$  bitscore and  $\geq 80\%$  alignment length cutoffs for a match. Predicted genes were further grouped in functional categories based on their best match against the SEED database using the subsystems categories



(Overbeek et al., 2005) and the KEGG-orthology using Ghost-KOALA (Kanehisa, Sato, Kawashima, Furumichi, & Tanabe, 2016).

Metagenomic reads were mapped on the predicted genes from the assembly using BLAT (Kent, 2002) with at least 95% identity and 50% of query length aligned. The abundance of each gene on each dataset was estimated by the number of reads that mapped on the genes with the above cutoffs (gene coverage) after normalizing for gene length. The relative abundance of annotation terms (subsystems) in each dataset was estimated based on the sum of the abundances of the corresponding genes, normalized for dataset size (*i.e.*, total number of reads). Differentially abundant categories between samples were identified with the DESeq2 package version 3.0.2 (Anders & Huber, 2010) using the binomial test and false discovery rate <0.05.

**Correlation analysis.** Spearman correlations between MAGs abundances and environmental factors were calculated using the PAST software (Hammer, Harper, & Ryan, 2001). Canonical Correspondence Analysis (CCA) between MAGs abundance and environmental parameters was performed using the Vegan package in R (Oksanen et al., 2013).

## Comparisons to other metagenomes

Available protein datasets from Kalamas River in Greece (kal2feb; Meziti, Tsementzi, Ar. Kormas, Karayanni, & Konstantinidis, 2016) and Yellowstone National Park (CIS\_19; Inskeep et al., 2013) metagenomes were analyzed and annotated similarly to the Thermopyles datasets. These datasets were used in order to compare microbial community function between Thermopyles and another freshwater environment in Greece (Kalamas) and a geothermal spring in the United States (Yellowstone). Comparisons between

metagenomic datasets were performed based on the gene counts of the different functional  
 234 annotation terms (subsystems). To make these counts comparable between datasets,  
 protein sequences were first clustered using the CD-HIT algorithm (Fu, Niu, Zhu, Wu, & Li,  
 236 2012) with the following parameters: S=97 (similarity threshold) and aL=0.5 (minimum  
 length coverage). Representative proteins from each cluster were annotated based on their  
 238 best match against the SEED database. Comparisons between gene counts of different  
 subsystems were performed using DESeq2 as described above.

## 242 RESULTS

### *Microbial community structure of Thermopyles*

244 In the metagenomic datasets, a total of 887,602 individual reads encoding fragments  
 of the 16S rRNA gene were detected (Table S1). [Sample naming scheme: the two letters  
 246 and the two numbers reflect the month and the year, in which the sample was collected. e. g.  
 AU13 represents a sample collected in August 2013]. Bacterial sequences predominated  
 248 since only 0.05% of the total reads were assigned to *Archaea*. The highest diversity as  
 indicated by OTU richness measurements using Chao and Shannon indices was observed in  
 250 the DE15 sample while the lowest value was observed for DE16 (Table S1). Good's coverage  
 values exceeded 0.98 samples indicating that approximately 98% of the total 16S rRNA  
 252 gene-based OTUs were recovered by sequencing. Consistent with this finding based on 16S  
 rRNA gene fragments, the majority (60.9-93.5%) of the metagenomic reads assembled in  
 254 contigs longer than 500bp (Table S1). The coverage of the microbial community achieved  
 by the corresponding metagenomic dataset was also estimated based on the redundancy of  
 256 the reads using the Nonpareil algorithm (Rodriguez-R & Konstantinidis, 2014), which  
 confirmed the relatively low complexity of all of the samples as evidenced by coverage

258 values ranging from 0.77 to 0.94 (Table 1). In total 5,956 OTUs were observed in all time  
points. Only 66% of these OTUs had a >97% identity match against the SILVA database,  
260 while the rest represented ‘novel’ OTUs (Table S1). Those novel OTUs comprised a  
substantial portion of the total community, accounting for 16%-40% of the total reads in  
262 each sample (Table S1).

Taxonomic composition was estimated based on the short reads encoding 16S rRNA  
264 gene fragments recovered in the metagenomes. *Proteobacteria* were the most abundant  
phylum across all samples (Fig. S1a). Class level taxonomic distributions revealed the  
266 dominance of *Epsilonproteobacteria* (>60% of total sequences) in most samples, usually  
followed by *Gamma*- and/or *Alphaproteobacteria* (Fig. S1b). [Note that the classification of  
268 *Epsilonproteobacteria* has been the target of several recent studies and the proposal of a  
separate phylum, *Epsilonbacteraeota*, has been suggested (Waite et al., 2017). Since then  
270 different databases (e.g., SILVA) have followed this suggestion while others have not (e.g.,  
GenBank). In this study, different databases are used for classification, but we chose to use  
272 the GenBank classification of *Epsilonproteobacteria* as a Class within *Proteobacteria* phylum  
for consistency with most previous studies].

274 From the 5,956 OTUs observed in all time points, 165 represented shared OTUs,  
comprising 18.14-91.64% (average 74.09%) of the total 16S rRNA gene carrying reads per  
276 sample (Table S1). Given the similar sequencing depth across the samples (Table 1, S1), the  
comparison of the number of detected shared OTUs can provide a reliable picture of the  
278 size and composition of the “core” bacterial community in the springs. This ‘core’ bacterial  
community mainly consisted of representatives of the *Piscirickettsiaceae*, *Sulfurovaceae*, and  
280 *Campylobacteraceae* families, and the *Halothiobacillus*, *Sulfurovum*, *Arcobacter*,  
*Sulfuricurvum* and *Sulfurimonas* genera (Fig. S1c). Changes in the abundance of the core  
282 microbial communities did not exhibit any apparent seasonal pattern, which was consistent

with the results of the Morisita analysis showing increased similarities between samples over long periods of time i.e. JN11 vs DE16 or JN10 vs JN15, interrupted by highly differentiated samples (DE11, DE14) (Fig. 1a). Apart from similarities in terms of taxonomic diversity, the size of the microbial community remained stable during the seven years as evidenced by DAPI counts ranging from 85,434 to 98,888 cells/ml (Table S1).

Consistent with the results reported above based on individual OTUs, our non-metric multidimensional scaling (NMDS) (stress: 12.57%) analysis performed at the whole community level based on the normalized abundances for metagenome size of all identified OTUs revealed no measured environmental parameters (e.g., season, precipitation, pH) to be significant for the ordination of the samples (Fig. S2). Further, cluster analysis revealed four distinct clusters exhibiting intra-cluster similarities exceeding 75% (vs. 32-60% between clusters), and two samples (DE11 and DE14) with much lower similarities to the rest of the samples (Fig. 1a). DE11 and DE14 showed <20% similarity to any other sample and to each other.

### ***Microbial functional diversity and comparisons to other habitats.***

The number of predicted genes from the metagenomic assemblies ranged from 29,561 (DE16) to 112,357 (DE14) (Table 1) reflecting the underlying microbial community diversity of the samples. Average contig length ranged from 2,318 bp (DE11) to 4,692 bp (DE14), while the largest contigs observed ranged from 104,928 bp (DE11) to 691,025 bp (OC16), (Table 1).

Functional distributions were evaluated based on the classification of genes in the subsystems hierarchical annotation scheme of the SEED database, resulting in 13.94% (DE11) to 54.16% (AG13) of total reads mapping on assembled genes that have SEED subsystems annotations (Table S1). Cluster analysis performed on the abundance

distributions of different functions revealed higher Morisita similarities than the taxonomic (OTUs) similarities mentioned above, suggesting a greater number of shared functions among all samples (Fig. 1b). Consistent with the taxonomic results, DE11 exhibited the lowest functional similarities with the rest of the samples (<70%), while DE14 was more similar with the rest of the samples compared to the taxonomic diversity comparisons described above (Fig. 1b). Overall, DE11 exhibited higher abundances of CO<sub>2</sub> fixation, metabolism of aromatic compounds, ammonia assimilation, phages prophages and transposable elements, sulfate reduction and CRISPRs related genes, and relatively lower abundance of denitrification, dissimilatory nitrite reduction and nitrate/nitrite ammonification compared to the other metagenomes (Fig. 2a). Pairwise comparisons using DeSeq2 of the functional distributions from all Thermopyles samples revealed relatively similar gene content with none of the 1,114 identified subsystems exhibiting significantly different abundances ( $p_{\text{adj}} > 0.05$ ). In general, differentially abundant functions did not exhibit any specific pattern regarding season or month, similar to the OTU patterns mentioned above.

When comparisons were performed with other habitats, several significant differences ( $p_{\text{adj}} < 0.05$ ) were observed (Table S2, Fig. 2b) in terms of functional gene diversity. Overall, Thermopyles samples exhibited increased allelic diversity (i.e., a higher number of distinct variants of the same protein function at the 97% amino-acid similarity threshold) compared to both Kalamas and Yellowstone for all genes involved in sulfur oxidation pathways including all genes from the *sox* pathway as well as genes for flagellar motility, potassium homeostasis and the carboxysome. Flagellar motility genes are generally increased in springs relative to riverine samples since microorganisms use motility in order to find the niche with the most favorable concentrations of oxygen and nutrients. The relative lower frequency of flagellar motility genes found in the Yellowstone

samples could be attributed to the decreased water flow (e.g., samples collected mostly from bottom or suspended sediment) in this ecosystem vs. the Thermopyles one. Similarly the highly abundant carboxysome genes in Thermopyles were most probably associated with *Cyanobacteria* that are abundant in the travertine deposits of Thermopyles (Kanellopoulos et al., 2016) but are absent from the specific site studied in Yellowstone. Gene diversity was increased in both Thermopyles and Yellowstone compared to Kalamas for CRISPR genes as well as ferredoxin oxidoreductase homologs, which are important in the reverse TCA cycle often observed in sulfidic and anaerobic environments dominated by *Epsilonproteobacteria* and *Archaea* (Fig. 2b). Diversity in CRISPR related genes was much higher in Thermopyles where 160 different genes were detected in total including genes related to cas1-9, Cmr3/4/6, and Csd1/2/5/7 gene families while in Kalamas only the Cas2 related proteins were detected.

Sulfur and nitrogen metabolism are of special interest for the microbial ecology of Thermopyles due to the chemical composition of the groundwater feed, and thus the corresponding pathways were examined in more detail using KEGG annotations. For sulfur metabolism, three pathways were assessed, i.e., M00595 for thiosulfate oxidation by the *sox* pathway (*soxABCDXYZ*), M00596 for dissimilatory sulfate reduction (*dsr*) and M00176 for assimilatory sulfate reduction (*asr*). Most samples contained all genes of the *sox* pathway and partial detection was observed in the rest, similar to the *asr* pathway (Fig. 2C). The complete *dsr* pathway was detected in eight samples while partial detection was observed in three samples and complete absence in the rest. For the samples in which partial detection was observed the calculation of genome equivalents showed that absence was probably due to low coverage rather than real absence (Table S6). Genome equivalent analysis also showed higher abundance (3 to 50 fold) of *soxCDY* genes relative to the rest of the genes of the pathway, implying that members of the community could follow an

358 alternative pathway for sulfur oxidation with the absence of *soxABZX* as suggested  
previously for other systems (Lahme et al., 2019).

360 Regarding nitrogen metabolism, KEGG pathways predicted to be present in  
Thermopyles samples included nitrogen fixation (*nif*; KEGG ID M00175), assimilatory  
362 nitrate reduction (*anr*; KEGG ID M00531), as well as dissimilatory nitrate reduction (*dnr*;  
KEGG ID M00530) pathways. Nitrogen fixation genes, *nifHDK* and *vnfH* were present in all  
364 metagenomes apart from FE15. The *dnr* pathway was complete in all metagenomes and *anr*  
was complete in all metagenomes apart from MY14 and DE14 in which gene *nirA* for the  
366 transformation of nitrite to ammonia was absent (Fig 3c).

Amongst the total SEED subsystems detected in at least one of the samples, 250 out  
368 of 1,234 were common in all the habitats analyzed, and were present in more than half  
(eight) of the Thermopyles samples. Genes coding for these proteins were considered  
370 orthologous and were further analyzed for their %G+C content. The %G+C content in  
Thermopyles was significantly higher (61.6%) than the respective %G+C contents in  
372 Kalamas (47.2%) and Yellowstone (55.1%) (t-test,  $p < 0.0001$ ).

### 374 **Novelty of the Metagenome Assembled Genomes (MAGs).**

In total, 78 good quality MAGs, i.e., completeness >70% and contamination (<10%), were  
376 recovered from the 17 samples. After ANI pairwise comparisons, the MAGs were grouped  
using a cutoff of 95% (threshold for species) in 43 genomospecies (GSP) for further analysis  
378 (Table 2). The best quality (i.e., highest completeness, lowest contamination) MAG of each  
genomospecies was used as a representative.

380 Our assessment revealed that the majority of the MAGs (15/43) belonged to  
*Epsilonproteobacteria* followed by *Gammaproteobacteria* (Table 2), consistent with the 16S  
382 rRNA gene-based OTU results mentioned above. The majority of the *Epsilonproteobacteria*



affiliated MAGs were only classified to the order or class level compared to all previously  
 384 named species of isolates, suggesting that they represent novel families, not previously  
 classified and/or with no genome representatives. Results from GTDB-tK classifications for  
 386 the *Epsilonproteobacteria* MAGs were consistent, showing that our MAGs probably  
 represent novel genera and/or families (Table 2). This finding partially agreed with the 16S  
 388 results that showed ~15% of the *epsilonproteobacterial* classified OTUs belong to novel  
 genera and 8% of them to novel families (Table S1).

390 In order to better study the taxonomy and function of abundant MAGs, 23 MAGs  
 exhibiting high relative abundance (Table S3) and potential involvement in the sulfur cycle  
 392 based on their predicted gene content were chosen for further investigation (Table 2,  
 Fig.3a). Five of these MAGs (*Sulfurovum\_X*) belonged to closely related species exhibiting  
 394 ANI similarities below 95% but above 72% among them (Table S4). These MAGs had  
*Sulfurovum lithotrophicum* NZ CP011308 (Jeon et al., 2015) as a closest relative exhibiting  
 396 AAI similarities between 52.68%-63.05% based on MiGA (Table 2); thus, they share only  
 class and/or order with their closest relative and represent a novel genus, if not family. The  
 398 *Sulfurovum* MAGs were dominant in most samples with coverage and relative abundances  
 exceeding 100X and 20% of total community, respectively (Fig. 2A, Table S3).

400 The rest of the MAGs were taxonomically classified ( $p < 0.1$ ) to *Epsilonproteobacteria*  
 or *Campylobacteriales* having *Sulfuricurvum*, *Arcobacter* and *Sulfurimonas* genera as best  
 402 matches with closest relatives *Sulfuricurvum kujiense* DSM 16994 NC 014762T, *Arcobacter*  
*sp.* L NC 017192 and *Sulfurimonas autotrophica* DSM 16294 NC 014506T, respectively;  
 404 Table 2). ANI values between MAGs with the same closest relative varied from 71.14% to  
 90.32%, implying that they most likely belong to the same family or genus and revealed  
 406 substantial intra-genus diversity at Thermopyles similar to the *Sulfurovum* MAGs  
 mentioned above (Table S4). The remaining MAGs were taxonomically classified to



408 *Brevundimonas*, *Halothiobacillus*, *Thioclava*, *Stenotrophomonas*, *Thiotrichales* and  
*Betaproteobacteria*.

410

### Key Metabolic Functions of the MAGs.

412 Key energy generating pathways were searched in the 23 abundant MAGs (Table 2)  
suspected to be involved in the sulfur cycle, including pathways for sulfur and nitrogen  
414 cycling as well as for carbon fixation. In addition to the KEGG pathways for sulfur and  
nitrogen cycling mentioned above, pathways for reductive TCA cycle (M00173) and sulfide  
416 quinone reductase (*sqr*; E.C.1.8.5.4) for the oxidation of sulfide to elemental sulfur were  
analyzed.

418 Using a similar approach and thresholds as mentioned above for assembled contigs  
and genes, *sqr* was detected in all *Epsilonproteobacteria* classified MAGs indicating the  
420 formation of elemental sulfur. Genes for the oxidation of thiosulfate by the sox pathway was  
partially observed in some *Sulfurovum*, *Sulfuricurvum*, *Arcobacter*, *Halothiobacillus* and  
422 *Thioclava* MAGs, while the complete complex was observed only in *Sulfurimonas\_0* (Fig. 3b)  
agreeing with previous studies (Han & Perner, 2015). The absence of some genes from the  
424 sox complex could be attributed to low completeness in some cases such as with the  
*Sulfurovum* MAGs. However, the absence of specific genes (*soxCD*) in the *Sulfuricurvum*  
426 MAGs could indicate alternative pathways previously detected in *Sulfuricurvum* *sp.*, in  
which thiosulfate oxidation ends up with the accumulation of sulfur globules or polysulfide  
428 (Friedrich, Bardischewsky, Rother, Quentmeier, & Fischer, 2005; Frigaard & Dahl, 2008).

Regarding *dsr*, only *Sulfuriferula\_C* possessed the complete pathway while no related  
430 genes were observed in the other MAGs. For *asr*, the complete pathway was only detected  
in *Thioclava*, *Arcobacter\_S* and *Brevundimonas\_Ga*, while *Sulfurimonas*, *Arcobacter*,  
432 *Sulfuriferula\_C*, *Halothiobacillus* and *Brevundimonas* MAGs possessed only some genes of

the pathway mostly only including the genes for the first step, that is the transformation of sulfate to adenosine 5' phosphosulfate (APS) (Fig.3b). Almost all of the MAGs possessed the enzyme sulfate adenylyltransferase (*sat*), which is one of the enzymes responsible for the formation of APS in *dsr* and *asr* without possessing any other enzymes of the pathway. In these cases, both pathways were considered absent.

For nitrogen metabolism, the enzymes for nitrogen fixation were detected in *Arcobacter* and *Sulfuriferula* MAGs, along with the complete *dnr* pathway. The *dnr* pathway was also present in *Thioclava\_G* and a partial pathway, missing the enzymes for production of nitrite, was present in *Sulfurovum*, *Sulfuricurvum* and *Sulfurimonas*. The remaining MAGs possessed only a few or no genes of the pathway. The *anr* pathway was complete only in *Sulfuricurvum* and genes for enzymes catalyzing the first step of *anr* (that is formation of nitrite) were detected in *Arcobacter\_S*, *Thioclava\_G*, *Sulfurimonas\_C* and *Thiotrichales* MAGs (Fig.3b). These findings agreed with previous studies showing that nitrate can be used as an alternative electron acceptor for members of the *Sulfurovum*, *Sulfuricurvum*, *Sulfurimonas* and *Arcobacter* genera (Hamilton, Jones, Schaperdorth, & Macalady, 2015; Han & Perner, 2015).

Finally the TCA cycle was observed in all MAGs as expected but the key genes for the reductive TCA cycle, i.e., ATP citrate lyase; fumarate reductase and 2-oxoglutarate:ferredoxin oxidoreductase were observed only in *Sulfurovum*, *Sulfuricurvum*, *Sulfurimonas* and *Arcobacter* MAGs (Fig. 3b) indicating that these species are capable of CO<sub>2</sub> fixation.

### **Correlation of MAG abundances with environmental parameters.**

In general, only a few and rather weak correlations were observed between MAG relative abundances and environmental parameters (Table S5). Most notably, pH value was

positively correlated with abundance of *Sulfuricurvum\_G*, temperature was negatively correlated with *Sulfurovum\_O* and positively with *Sulfurimonas\_O* abundances, while conductivity was positively correlated with *Halothiobacillus* abundance. Several correlations in abundances were observed between MAGs (Table S5) indicating possible synergistic or antagonistic interactions. Canonical Correspondence Analysis (CCA) confirmed the abovementioned results on differences in community composition characterizing samples DE11 and DE14 at the MAG level, while pH and conductivity emerged as important factors ( $P < 0.05$ ) for the ordination of the samples based on MAG abundances (Fig. S3)

## Discussion

As mentioned above, Thermopyles are characterized by high sulfide concentrations; hence it is expected that sulfides are an important energy source for autotrophic microorganisms (Porter, Engel, Kane, & Kinkle, 2009; Han et al., 2012; Rossmassler, Hanson, & Campbell, 2016). Moreover, *Epsilonproteobacteria* have been detected to be key players in sulfur metabolism in sulfide rich environments (Hamilton et al., 2015; Han et al., 2012; Rossmassler, Hanson, & Campbell, 2016) and were also prevalent in the Thermopyles samples collected in 2005 (Kormas et al., 2009). In agreement with these expectations and previous results, *Epsilonproteobacteria* were prevalent in our time series and their relative abundances were largely unaffected by environmental factors as revealed by 16S rRNA gene and MAGs data (Fig.3a, S2). Further, the presence of 'core' species revealed that Thermopyles microbial communities are dominated by specific microbial populations, which probably interact among each other (synergistically or competitively) and represent mostly novel genera, if not families. Results from a previous study in

Yellowstone Park agreed with the presence of core communities despite the latter study including only three samples collected for 3 years on a yearly basis and lacking seasonal resolution (De León, Gerlach, Peyton, & Fields, 2013).

Although it was expected that sulfur cycling related pathways would be prevalent in Thermopyles, our study represents the first actual documentation of prevalent microbially-mediated processes related to sulfur and thiosulfate oxidation as well as assimilatory and dissimilatory sulfate reduction in a terrestrial sulfur geothermal spring. Our analysis also revealed substantially higher functional than taxonomic similarity (Fig. 1), revealing core functions dominating Thermopyles regardless of the prevailing environmental conditions (Fig. 2a). Prevalent functions in Thermopyles compared to another (non-sulfur rich, non high temperature) freshwater habitat included CRISPRs, sulfur oxidation and reductive TCA cycle related genes (Fig. 2b). These results also agreed with previous results from similar habitats (López-López et al., 2013; Sikorski et al., 2010). Increased diversity of CRISPR related genes, representing different Cas, Cmr and Csc proteins, has also been detected in Yumthang geothermal spring system that exhibits similar physicochemical properties with Thermopyles (Najar, Sherpa, Das, & Thakur, 2020), CRISPR systems are considered stress regulators since they represent defensive tools by attacking viruses and plasmids (Louwen, Staals, Endtz, Baarlen, & Oost, 2014) and are more abundant in thermophilic than mesophilic bacteria, as has been shown in some environmental (Makarova, Grishin, Shabalina, Wolf, & Koonin, 2006; Westra, van Houte, Gandon, & Whitaker, 2019) and predictive modeling studies (Weissman, Laljani, Fagan, & Johnson, 2019).

The prevalence of proteins related to flagellar motility corroborates with results from other geothermal habitats (Badhai, Ghosh, & Das, 2015) but the lower abundances in Yellowstone sulfur rich sediment sample pointed out the importance of water flow characterizing different geothermal springs (Inskeep et al., 2013). Similarly the prevalence

508 of carboxysome genes indicated the importance of *Cyanobacteria* in CO<sub>2</sub> fixation at  
Thermopyles additionally to chemoautotrophy. This feature was absent from Yellowstone  
510 CIS\_19 site, since this was an archaea dominated site, but other sites in Yellowstone, with  
temperatures and pH similar to Thermopyles, were mostly phototrophic and dominated  
512 from *Cyanobacteria*. Nonetheless, the latter sites lacked chemoautotrophy related  
pathways, showing once more the importance of different physical (i.e. flow) and  
514 geochemical (i.e. dissolved sulfides, temperature) characteristics, which, in combination,  
drive microbial community structure and metabolic properties.

516 Also at the genome level, concurrent with previous data for sulfide rich habitats  
(Hamilton et al., 2015), all the *Epsilonproteobacteria* MAGs analyzed possessed pathways  
518 for sulfur oxidation and CO<sub>2</sub> fixation via the reductive TCA cycle. The presence of complete  
or incomplete sulfur oxidation pathways in the genome of the close relatives of the MAGs  
520 reported here, coupled to the frequent co-presence of sulfide quinone reductase (*sqr*)  
genes, further corroborated the metabolic versatility of *Epsilonproteobacteria* (Friedrich et  
522 al., 2005; Frigaard and Dahl, 2008; Hamilton et al., 2015, Han & Perner, 2015, Rossmassler  
et al. 2016, Wright, Williamson, Grasby, Spear, & Templeton, 2013).

524 The presence of different pathways oxidizing different sulfur compounds and  
producing either sulfate or elemental sulfur, along with correlation analysis results (Table  
526 S5, Fig. S3), implied that synergistic or antagonistic relationships between  
*Epsilonproteobacterial* populations could influence taxonomic and functional diversity at  
528 Thermopyles. Another explanation for the high intra-genus species and pathway diversity  
could be the ability to utilize alternative sulfur oxidation pathways when conditions are  
530 unfavorable or different affinities of different alleles for the same substrate exist. The  
importance of other environmental factors that were not measured here (i.e., metal

concentrations) should be noted as a probable factor that could be included in future studies in order to better explain the prevalence of specific species at different time points.

Altogether, it appears that chemoautotrophic microbial communities that mainly oxidize different reduced sulfur compounds using oxygen or nitrate as electron acceptors inhabit Thermopyles. Although all sulfur oxidizing MAGs detected in this study probably consist of new genera that are members of a new family, they all belong to the *Epsilonproteobacteria* phylum, closely or remotely related to the genera *Sulfurovum*, *Sulfuricurvum*, *Sulfurimonas* and *Arcobacter* (Table 2). Similar communities have been observed in sulfur rich environments in the past (Hamilton et al., 2015; Hotelling et al., 2019; Huegler et al., 2010; Rossmassler et al., 2016, Wright et al., 2013), but only once in a terrestrial geothermal spring (Reigstad et al., 2011) and cross-sectional (as opposed to a time series of seven years here) data. Notably, comparisons with genomes from some of these studies (when available) showed that the *Epsilonproteobacteria* detected in these previous studies, were remotely affiliated with the ones detected here. This indicated once more that Thermopyles prevalent bacteria are members of ‘novel’ genera and/or families that possess similar sulfur oxidizing properties with known species, further supporting a universal functional profile of *Epsilonproteobacteria* in sulfur rich environments.

The community composition of the two outlier samples with respect to stable core community (DE11 and DE14; Figs. 1a, 3a, S1c) was the only case that could be attributed to changes in environmental parameters such as conductivity and pH, respectively. From our data, it appears that changes in conductivity were positively correlated with precipitation during the days prior to sampling, though it has been previously noted that conductivity in Thermopyles is mostly influenced by sea tides that cause inflow of seawater in the spring (Zarikas et al., 2014). *Hallothiobacillus* MAG prevalence in DE11, along with its positive correlation with conductivity, was further supported by the known halotolerant character

of *Halothibacillus* sp. not requiring salt in order to grow but growing optimally when salt concentrations increase (Sievert, Heidorn, & Kuever, 2000). Hence, we cannot conclude about the exact underlying cause of the unique diversity observed in samples DE11 and DE14, although it was most certainly related to inputs from non-geothermal sources.

The *Sulfuricurvum*\_Ga MAG drop in abundance in MY14 and DE14 samples, along with a negative correlation with pH (Table S5), was further supported by previous studies showing that the type species of the genus, *Sulfuricurvum kujiense* (Kodama & Watanabe 2004), has a pH range between 6 and 8 while it grows optimally at pH 7 (Han et al., 2012). However, the prevalence of *Brevundimonas* related species in DE14 could not be linked to the pH drop since *Brevudimonas* species are alkalophiles, and this is further supported by their presence in alkaline thermal springs (Gupta, Gupta, Capalash, & Sharma, 2017; Tekere et al. 2011). The increased rainfall prior to sampling the DE14 sample, coupled with the 16S rRNA and MAG relative abundance and coverage data showing decreased *Epsilonproteobacteria* and increased *Alpha*-, *BetaProteobacteria* and *Actinobacteria* abundances might indicate influences from soil.

Finally, our results collectively showed that Thermopyles microbial communities are mainly fueled by chemolithotrophic processes performed by core sulfide oxidizing bacterial taxa that persist over time. Short intervals might be driven by changes in environmental parameters but changes in taxonomy never override the persistence of core functions. The outcome of this study, that is gene and genome sequences from 'novel' sulfur oxidizing bacteria, will be useful for the metagenomic investigation of other, similar environments. Future studies could assist on further understanding of evolutionary relationships and functionality of these and related microbial communities.

582    **Acknowledgements:**

          This work was partly funded by the US National Science Foundation, awards #1831582 and  
584    #1759831 (to KTK), and by internal funding from the University of Thessaly (KAK). We  
          thank the Partnership for an Advanced Computing Environment (PACE) at the Georgia  
586    Institute of Technology, which enabled the computational tasks associated with this study.



## References

- Anders, S., & Huber, W. (2010). Differential expression analysis for sequence count data. *Genome Biology*, 11(10), R106. doi: 10.1186/gb-2010-11-10-r106
- Badhai, J., Ghosh, T. S., & Das, S. K. (2015). Taxonomic and functional characteristics of microbial communities and their correlation with physicochemical properties of four geothermal springs in Odisha, India. *Frontiers in Microbiology*, 6, 1166. doi: 10.3389/fmicb.2015.01166
- Barns, S. M., Delwiche, C. F., Palmer, J. D., & Pace, N. R. (1996). Perspectives on archaeal diversity, thermophily and monophyly from environmental rRNA sequences. *Proceedings of the National Academy of Sciences*, 93(17), 9188. doi: 10.1073/pnas.93.17.9188
- Barns, S. M., Fundyga, R. E., Jeffries, M. W., & Pace, N. R. (1994). Remarkable archaeal diversity detected in a Yellowstone National Park hot spring environment. *Proceedings of the National Academy of Sciences*, 91(5), 1609. doi: 10.1073/pnas.91.5.1609
- Boomer, S. M., Lodge, D. P., Dutton, B. E., & Pierson, B. (2002). Molecular characterization of novel red green nonsulfur bacteria from five distinct hot spring communities in Yellowstone National Park. *Applied and Environmental Microbiology*, 68(1), 346–355. doi: 10.1128/aem.68.1.346-355.2002
- Burgess, E. A., Unrine, J. M., Mills, G. L., Romanek, C. S., & Wiegel, J. (2012). Comparative geochemical and microbiological characterization of two thermal pools in the Uzon Caldera, Kamchatka, Russia. *Microbial Ecology*, 63(3), 471–489. doi: 10.1007/s00248-011-9979-4
- Caporaso, J. G., Kuczynski, J., Stombaugh, J., Bittinger, K., Bushman, F. D., Costello, E. K., ... Knight, R. (2010). QIIME allows analysis of high-throughput community sequencing data. *Nature Methods*, 7(5), 335–336. doi: 10.1038/nmeth.f.303
- Chan, C. S., Chan, K.-G., Tay, Y.-L., Chua, Y.-H., & Goh, K. M. (2015). Diversity of thermophiles in a Malaysian hot spring determined using 16S rRNA and shotgun metagenome sequencing. *Frontiers in Microbiology*, 6, 177. doi: 10.3389/fmicb.2015.00177
- Chaumeil, P.-A., Mussig, A. J., Hugenholtz, P., & Parks, D. H. (2020). GTDB-Tk: a toolkit to classify genomes with the Genome Taxonomy Database. *Bioinformatics*, 36(6), 1925–1927. doi: 10.1093/bioinformatics/btz848
- Childs, A. M., Mountain, B. W., O'Toole, R., & Stott, M. B. (2008). Relating Microbial Community and Physicochemical Parameters of a Hot Spring: Champagne Pool, Wai-o-tapu, New Zealand. *Geomicrobiology Journal*, 25(7–8), 441–453. doi: 10.1080/01490450802413841

- Cox, M. P., Peterson, D. A., & Biggs, P. J. (2010). SolexaQA: At-a-glance quality assessment of Illumina second-generation sequencing data. *BMC Bioinformatics*, 11, 485. doi: 10.1186/1471-2105-11-485
- Damer, B., & Deamer, D. (2019). The Hot Spring Hypothesis for an Origin of Life. *Astrobiology*, 20(4), 429–452. doi: 10.1089/ast.2019.2045
- De León, K., Gerlach, R., Peyton, B., & Fields, M. (2013). Archaeal and bacterial communities in three alkaline hot springs in Heart Lake Geyser Basin, Yellowstone National Park. *Frontiers in Microbiology*, 4, 330. doi: 10.3389/fmicb.2013.00330
- Duriez, A., Marlin, C., Dotsika, E., Massault, M., Noret, A., & Morel, J. L. (2008). Geochemical evidence of seawater intrusion into a coastal geothermal field of central Greece: example of the Thermopylae system. *Environmental Geology*, 54(3), 551–564. doi: 10.1007/s00254-007-0857-9
- Engel, A. S., Porter, M. L., Stern, L. A., Quinlan, S., & Bennett, P. C. (2004). Bacterial diversity and ecosystem function of filamentous microbial mats from aphotic (cave) sulfidic springs dominated by chemolithoautotrophic “Epsilonproteobacteria.” *FEMS Microbiology Ecology*, 51(1), 31–53. doi: 10.1016/j.femsec.2004.07.004
- Falkowski, P. G., Fenchel, T., & Delong, E. F. (2008). The Microbial Engines That Drive Earth’s Biogeochemical Cycles. *Science*, 320(5879), 1034. doi: 10.1126/science.1153213
- Flores, G. E., Liu, Y., Ferrera, I., Beveridge, T. J., & Reysenbach, A.-L. (2008). *Sulfurihydrogenibium kristjanssonii* sp. nov., a hydrogen- and sulfur-oxidizing thermophile isolated from a terrestrial Icelandic hot spring. Retrieved from <https://www.microbiologyresearch.org/content/journal/ijsem/10.1099/ijms.0.65570-0>
- Friedrich, C. G., Bardischewsky, F., Rother, D., Quentmeier, A., & Fischer, J. (2005). Prokaryotic sulfur oxidation. *Current Opinion in Microbiology*, 8(3), 253–259. doi: 10.1016/j.mib.2005.04.005
- Frigaard, N.-U., & Dahl, C. (2009). Sulfur metabolism in phototrophic sulfur bacteria. *Advances in Microbial Physiology*, 54, 103–200. doi: 10.1016/S0065-2911(08)00002-7
- Fu, L., Niu, B., Zhu, Z., Wu, S., & Li, W. (2012). CD-HIT: accelerated for clustering the next-generation sequencing data. *Bioinformatics (Oxford, England)*, 28(23), 3150–3152. doi: 10.1093/bioinformatics/bts565
- Georgalas, G., & Papakis, N. (1966). Observations sur les sources ordinaires et thermominerales radioactives de la region karstique de Kammena Vourla (Grece Centrale). In *Proc. Int. Assoc Hydrogeologists*. (pp. 221–227). N. Knjiga.

- Gupta, V., Gupta, N., Capalash, N., & Sharma, P. (2017). Bio-prospecting Bacterial Diversity of Hot Springs in Northern Himalayan Region of India for Laccases. *Indian Journal of Microbiology*, 57(3), 285–291. doi: 10.1007/s12088-017-0656-2
- Hamilton, T. L., Jones, D. S., Schaperdoth, I., & Macalady, J. L. (2015). Metagenomic insights into S(0) precipitation in a terrestrial subsurface lithoautotrophic ecosystem. *Frontiers in Microbiology*, 5, 756. doi: 10.3389/fmicb.2014.00756
- Hammer, O., Harper, D. A. T., & Ryan, P. D. (n.d.). *PAST: Paleontological Statistics Software Package for Education and Data Analysis*. 9.
- Han, C., Kotsyurbenko, O., Chertkov, O., Held, B., Lapidus, A., Nolan, M., ... Detter, J. C. (2012). Complete genome sequence of the sulfur compounds oxidizing chemolithoautotroph *Sulfuricurvum kujiense* type strain (YK-1T). *Standards in Genomic Sciences*, 6(1), 94. doi: 10.4056/sigs.2456004
- Han, Y., & Perner, M. (2015). The globally widespread genus *Sulfurimonas*: versatile energy metabolisms and adaptations to redox clines. *Frontiers in Microbiology*, 6, 989. doi: 10.3389/fmicb.2015.00989
- Headd, B., & Engel, A. S. (2013). Evidence for Niche Partitioning Revealed by the Distribution of Sulfur Oxidation Genes Collected from Areas of a Terrestrial Sulfidic Spring with Differing Geochemical Conditions. *Applied and Environmental Microbiology*, 79(4), 1171–1182. doi: 10.1128/AEM.02812-12
- Hotaling, S., Quackenbush, C. R., Bennett-Ponsford, J., New, D. D., Arias-Rodriguez, L., Tobler, M., & Kelley, J. L. (2019). Bacterial Diversity in Replicated Hydrogen Sulfide-Rich Streams. *Microbial Ecology*, 77(3), 559–573. doi: 10.1007/s00248-018-1237-6
- Hugenholtz, P., Pitulle, C., Hershberger, K. L., & Pace, N. R. (1998). Novel Division Level Bacterial Diversity in a Yellowstone Hot Spring. *Journal of Bacteriology*, 180(2), 366–376. Retrieved from <https://www.ncbi.nlm.nih.gov/pmc/articles/PMC106892/>
- Hügler, M., Gärtner, A., & Imhoff, J. F. (2010). Functional genes as markers for sulfur cycling and CO<sub>2</sub> fixation in microbial communities of hydrothermal vents of the Logatchev field. *FEMS Microbiology Ecology*, 73(3), 526–537. doi: 10.1111/j.1574-6941.2010.00919.x
- Inskip, W. P., Jay, Z. J., Tringe, S. G., Herrgård, M. J., Rusch, D. B., & YNP Metagenome Project Steering Committee and Working Group Members. (2013). The YNP Metagenome Project: Environmental Parameters Responsible for Microbial Distribution in the Yellowstone Geothermal Ecosystem. *Frontiers in Microbiology*, 4, 67. doi: 10.3389/fmicb.2013.00067

- Jeon, W., Priscilla, L., Park, G., Lee, H., Lee, N., Lee, D., ... Ahn, J. (2017). Complete genome sequence of the sulfur-oxidizing chemolithoautotrophic *Sulfurovum lithotrophicum* 42BKTT. *Standards in Genomic Sciences*, 12. doi: 10.1186/s40793-017-0265-z
- Kanehisa, M., Sato, Y., Kawashima, M., Furumichi, M., & Tanabe, M. (2016). KEGG as a reference resource for gene and protein annotation. *Nucleic Acids Research*, 44(D1), D457-462. doi: 10.1093/nar/gkv1070
- Kanellopoulos, C., Lamprinou, V., Mitropoulos, P., & Voudouris, P. (2016). Thermogenic travertine deposits in Thermopylae hot springs (Greece) in association with cyanobacterial microflora. *Carbonates and Evaporites*, 31(3), 239–248. doi: 10.1007/s13146-015-0255-4
- Kent, W. J. (2002). BLAT--the BLAST-like alignment tool. *Genome Research*, 12(4), 656–664. doi: 10.1101/gr.229202. Article published online before March 2002
- Kodama, Y., & Watanabe, K. (2004). *Sulfuricurvum kujiense* gen. nov., sp. nov., a facultatively anaerobic, chemolithoautotrophic, sulfur-oxidizing bacterium isolated from an underground crude-oil storage cavity. Retrieved from <https://www.microbiologyresearch.org/content/journal/ijsem/10.1099/ijms.0.63243-0>
- Konhauser, K. O., Phoenix, V. R., Bottrell, S. H., Adams, D. G., & Head, I. M. (2001). Microbial-silica interactions in Icelandic hot spring sinter: possible analogues for some Precambrian siliceous stromatolites. *Sedimentology*, 48(2), 415–433. doi: 10.1046/j.1365-3091.2001.00372.x
- Kormas, K. A., Tamaki, H., Hanada, S., & Kamagata, Y. (2009). Apparent richness and community composition of Bacteria and Archaea in geothermal springs. *Aquatic Microbial Ecology*, 57(2), 113–122. doi: 10.3354/ame01333
- Lahme, S., Callbeck, C. M., Eland, L. E., Wipat, A., Enning, D., Head, I. M., & Hubert, C. R. J. (2020). Comparison of sulfide-oxidizing *Sulfurimonas* strains reveals a new mode of thiosulfate formation in subsurface environments. *Environmental Microbiology*, 22(5), 1784–1800. doi: 10.1111/1462-2920.14894
- Lambrakis, N., & Kallergis, G. (2005). Contribution to the study of Greek thermal springs: hydrogeological and hydrochemical characteristics and origin of thermal waters. *Hydrogeology Journal*, 13(3), 506–521. doi: 10.1007/s10040-004-0349-x
- Lambrakis, N., Katsanou, K., & Siavalas, G. (2014, March 7). Geothermal fields and thermal waters of Greece: an overview. doi: 10.1201/b16646-11
- López-López, O., Cerdán, M. E., & González-Siso, M. I. (2013). Hot Spring Metagenomics. *Life*, 3(2), 308–320. doi: 10.3390/life3020308

- Louwen, R., Staals, R. H. J., Endtz, H. P., Baarlen, P. van, & Oost, J. van der. (2014). The Role of CRISPR-Cas Systems in Virulence of Pathogenic Bacteria. *Microbiology and Molecular Biology Reviews*, 78(1), 74–88. doi: 10.1128/MMBR.00039-13
- Makarova, K. S., Grishin, N. V., Shabalina, S. A., Wolf, Y. I., & Koonin, E. V. (2006). A putative RNA-interference-based immune system in prokaryotes: computational analysis of the predicted enzymatic machinery, functional analogies with eukaryotic RNAi, and hypothetical mechanisms of action. *Biology Direct*, 1(1), 7. doi: 10.1186/1745-6150-1-7
- Marinos, P., Frangopoulos, J., & Stournaras, G. (1973). *The thermomineral spring of Hypati (Central Greece): hydrogeological, hydrodynamical, geochemical and geotechnical study of the spring and the surrounding area*. 1(25), 105–214.
- MEYER-DOMBARD, D. R., SHOCK, E. L., & AMEND, J. P. (2005). Archaeal and bacterial communities in geochemically diverse hot springs of Yellowstone National Park, USA. *Geobiology*, 3(3), 211–227. doi: 10.1111/j.1472-4669.2005.00052.x
- Meziti, A., Tsementzi, D., Ar. Kormas, K., Karayanni, H., & Konstantinidis, K. T. (2016). Anthropogenic effects on bacterial diversity and function along a river-to-estuary gradient in Northwest Greece revealed by metagenomics. *Environmental Microbiology*, 18(12), 4640–4652. doi: 10.1111/1462-2920.13303
- Najar, I. N., Sherpa, M. T., Das, S., & Thakur, N. (2020). Bacterial diversity and functional metagenomics expounding the diversity of xenobiotics, stress, defense and CRISPR gene ontology providing eco-efficiency to Himalayan Hot Springs. *Functional & Integrative Genomics*, 20(4), 479–496. doi: 10.1007/s10142-019-00723-x
- Oksanen, J., Blanchet, F. G., Friendly, M., Kindt, R., Legendre, P., McGlinn, D., ... Wagner, H. (2019). *vegan: Community Ecology Package (Version 2.5-6)*. Retrieved from <https://CRAN.R-project.org/package=vegan>
- Overbeek, R., Begley, T., Butler, R. M., Choudhuri, J. V., Chuang, H.-Y., Cohoon, M., ... Vonstein, V. (2005). The Subsystems Approach to Genome Annotation and its Use in the Project to Annotate 1000 Genomes. *Nucleic Acids Research*, 33(17), 5691–5702. doi: 10.1093/nar/gki866
- Parks, D. H., Imelfort, M., Skennerton, C. T., Hugenholtz, P., & Tyson, G. W. (2015). CheckM: assessing the quality of microbial genomes recovered from isolates, single cells, and metagenomes. *Genome Research*, 25(7), 1043–1055. doi: 10.1101/gr.186072.114
- Peng, Y., Leung, H. C. M., Yiu, S. M., & Chin, F. Y. L. (2012). IDBA-UD: a de novo assembler for single-cell and metagenomic sequencing data with highly uneven depth. *Bioinformatics (Oxford, England)*, 28(11), 1420–1428. doi: 10.1093/bioinformatics/bts174

- Porter, M., Engel, A., Kane, T., & Kinkle, B. (2009). Productivity-Diversity Relationships from Chemolithoautotrophically Based Sulfidic Karst Systems. *International Journal of Speleology*, 38(1). doi: <http://dx.doi.org/10.5038/1827-806X.38.1.4>
- Pruesse, E., Quast, C., Knittel, K., Fuchs, B. M., Ludwig, W., Peplies, J., & Glöckner, F. O. (2007). SILVA: a comprehensive online resource for quality checked and aligned ribosomal RNA sequence data compatible with ARB. *Nucleic Acids Research*, 35(21), 7188–7196. doi: 10.1093/nar/gkm864
- Reigstad, L. J., Jorgensen, S. L., Lauritzen, S.-E., Schleper, C., & Urich, T. (2011). Sulfur-Oxidizing Chemolithotrophic Proteobacteria Dominate the Microbiota in High Arctic Thermal Springs on Svalbard. *Astrobiology*, 11(7), 665–678. doi: 10.1089/ast.2010.0551
- Reysenbach, A.-L., Banta, A. B., Civello, S., Daly, J., Mitchel, K., Lalonde, S. V., ... Takacs-Vesbach, C. D. (2006). *Aquificales in Yellowstone National Park*.
- Rodriguez-R, L. M., Gunturu, S., Harvey, W. T., Rosselló-Mora, R., Tiedje, J. M., Cole, J. R., & Konstantinidis, K. T. (2018). The Microbial Genomes Atlas (MiGA) webserver: taxonomic and gene diversity analysis of Archaea and Bacteria at the whole genome level. *Nucleic Acids Research*, 46(W1), W282–W288. doi: 10.1093/nar/gky467
- Rodriguez-R, L. M., & Konstantinidis, K. T. (2014). Nonpareil: a redundancy-based approach to assess the level of coverage in metagenomic datasets. *Bioinformatics (Oxford, England)*, 30(5), 629–635. doi: 10.1093/bioinformatics/btt584
- Rodriguez-R, L. M., & Konstantinidis, K. T. (2016). *The enveomics collection: a toolbox for specialized analyses of microbial genomes and metagenomes* (No. e1900v1). doi: 10.7287/peerj.preprints.1900v1
- Rossmassler, K., Hanson, T. E., & Campbell, B. J. (2016). Diverse sulfur metabolisms from two subterranean sulfidic spring systems. *FEMS Microbiology Letters*, 363(16). doi: 10.1093/femsle/fnw162
- Rye, R., & Truesdell, A. (2007). The Question of Recharge to the Deep Thermal Reservoir Underlying the Geysers and Hot Springs of Yellowstone National Park. *Publications of the US Geological Survey*. Retrieved from <https://digitalcommons.unl.edu/usgpspubs/82>
- Sievert, S. M., Heidorn, T., & Kuever, J. (2000). *Halothiobacillus kellyi* sp. nov., a mesophilic, obligately chemolithoautotrophic, sulfur-oxidizing bacterium isolated from a shallow-water hydrothermal vent in the Aegean Sea, and emended description of the genus *Halothiobacillus*. Retrieved from <https://www.microbiologyresearch.org/content/journal/ijsem/10.1099/00207713-50-3-1229>



- Sikorski, J., Munk, C., Lapidus, A., Djao, O. D. N., Lucas, S., Glavina Del Rio, T., ... Klenk, H.-P. (2010). Complete genome sequence of *Sulfurimonas autotrophica* type strain (OK10T). *Standards in Genomic Sciences*, 3(2), 194–202. doi: 10.4056/sigs.1173118
- Su, X., Xu, J., & Ning, K. (2012). Parallel-META: efficient metagenomic data analysis based on high-performance computation. *BMC Systems Biology*, 6(1), 1–11. doi: 10.1186/1752-0509-6-S1-S16
- Takacs-Vesbach, C., Mitchell, K., Jackson-Weaver, O., & Reysenbach, A.-L. (2008). Volcanic calderas delineate biogeographic provinces among Yellowstone thermophiles. *Environmental Microbiology*, 10(7), 1681–1689. doi: 10.1111/j.1462-2920.2008.01584.x
- Tekere, M., Louml, A., tter, Olivier, J., Jonker, N., & Venter, S. (2011). Metagenomic analysis of bacterial diversity of Siloam hot water spring, Limpopo, South Africa. *African Journal of Biotechnology*, 10(78), 18005–18012. doi: 10.5897/AJB11.899
- Tobler, D. J., & Benning, L. G. (2011). Bacterial diversity in five Icelandic geothermal waters: temperature and sinter growth rate effects. *Extremophiles*, 15(4), 473. doi: 10.1007/s00792-011-0378-z
- Toplin, J. A., Norris, T. B., Lehr, C. R., McDermott, T. R., & Castenholz, R. W. (2008). Biogeographic and phylogenetic diversity of thermoacidophilic cyanidiales in Yellowstone National Park, Japan, and New Zealand. *Applied and Environmental Microbiology*, 74(9), 2822–2833. doi: 10.1128/AEM.02741-07
- Verros, G. D., Latsos, T., Anagnostou, K. E., Avlakitiotis, P., Chaikalis, C., Liolios, C., ... Arsenos, P. (2007). *Physico-chemical Characteristics of Thermopylae Natural Hot Water Springs in Central Greece: Chemical Geothermometry*. 963, 412–415. doi: 10.1063/1.2836100
- Waite, D. W., Vanwonterghem, I., Rinke, C., Parks, D. H., Zhang, Y., Takai, K., ... Hugenholtz, P. (2017). Comparative Genomic Analysis of the Class Epsilonproteobacteria and Proposed Reclassification to Epsilonbacteraeota (phyl. nov.). *Frontiers in Microbiology*, 8, 682. doi: 10.3389/fmicb.2017.00682
- Weissman, J. L., Laljani, R. M. R., Fagan, W. F., & Johnson, P. L. F. (2019). Visualization and prediction of CRISPR incidence in microbial trait-space to identify drivers of antiviral immune strategy. *The ISME Journal*, 13(10), 2589–2602. doi: 10.1038/s41396-019-0411-2
- Westra, E. R., van Houte, S., Gandon, S., & Whitaker, R. (2019). The ecology and evolution of microbial CRISPR-Cas adaptive immune systems. *Philosophical Transactions of the Royal Society B: Biological Sciences*, 374(1772), 20190101. doi: 10.1098/rstb.2019.0101

- Wilkins, L. G. E., Ettinger, C. L., Jospin, G., & Eisen, J. A. (2019). Metagenome-assembled genomes provide new insight into the microbial diversity of two thermal pools in Kamchatka, Russia. *Scientific Reports*, 9(1), 3059. doi: 10.1038/s41598-019-39576-6
- Wright, K., Williamson, C., Grasby, S., Spear, J., & Templeton, A. (2013). Metagenomic evidence for sulfur lithotrophy by Epsilonproteobacteria as the major energy source for primary productivity in a sub-aerial arctic glacial deposit, Borup Fiord Pass. *Frontiers in Microbiology*, 4, 63. doi: 10.3389/fmicb.2013.00063
- Wu, Y.-W., Tang, Y.-H., Tringe, S. G., Simmons, B. A., & Singer, S. W. (2014). MaxBin: an automated binning method to recover individual genomes from metagenomes using an expectation-maximization algorithm. *Microbiome*, 2, 26. doi: 10.1186/2049-2618-2-26
- Yamamoto, H., Hiraishi, A., Kato, K., Chiura, H. X., Maki, Y., & Shimizu, A. (1998). Phylogenetic Evidence for the Existence of Novel Thermophilic Bacteria in Hot Spring Sulfur-Turf Microbial Mats in Japan. *Applied and Environmental Microbiology*, 64(5), 1680–1687. Retrieved from <https://www.ncbi.nlm.nih.gov/pmc/articles/PMC106215/>
- Zarikas, V., Anagnostou, K. E., Avlakitiotis, P., Kotsopoulou, S., Liolios, C., Latsos, T., ... Antoniou, D. (2014). Measurement and Analysis of Physicochemical Parameters Concerning Thermopylae Natural Hot Spring Waters. *Journal of Applied Sciences*, 14(19), 2331–2340. doi: 10.3923/jas.2014.2331.2340
- Zhu, W., Lomsadze, A., & Borodovsky, M. (2010). Ab initio gene identification in metagenomic sequences. *Nucleic Acids Research*, 38(12), e132–e132. doi: 10.1093/nar/gkq275



## Figure Legends

### Figure 1

Clustering of Thermopyles samples based on a) OTU and b) seed subsystems relative abundance profiles

### Figure 2

Functional profiles of Thermopyles microbial communities

- a) Subsystems (SEED database) with significant differences in abundance through time (Negative binomial test, DeSEQ,  $p < 0.05$ ; scale corresponds to number of normalized reads)
- b) Statistically significant differences in gene content (derived from the number of different genes that could be assigned to a subsystem) between Thermopyles, Yellowstone and Kalamas samples (Negative binomial test, DeSEQ,  $p_{adj} < 0.05$ ; scale corresponds to normalized number of different genes).

### Figure 3

Abundance of MAGs and presence of specific pathways in metagenomes and MAGs

- a) Abundance of the identified bacterial populations (MAGs); scale: coverage.
- b) Presence/absence of specific pathways in different MAGs
- c) Presence/absence of specific pathways in different metagenomes

*dsr*: dissimilatory sulfate reduction, *asr*: assimilatory sulfate reduction, *sqr*: sulfide oxidoreductase, *nifx*: nitrogen fixation, *dnr*: dissimilatory nitrate reduction, *anr*: assimilatory nitrate reduction, *denitr*: denitrification, rTCA: reductive TCA cycle.

Figure 1

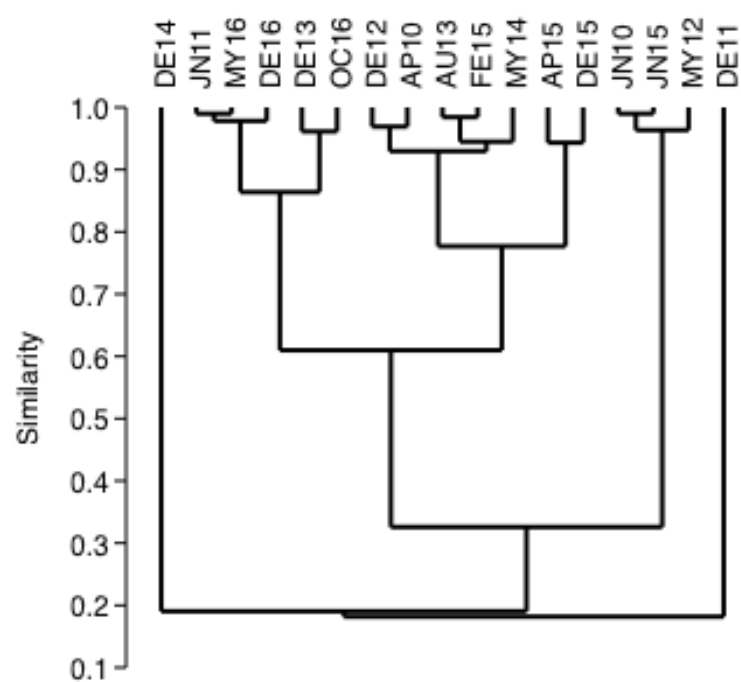

(a)

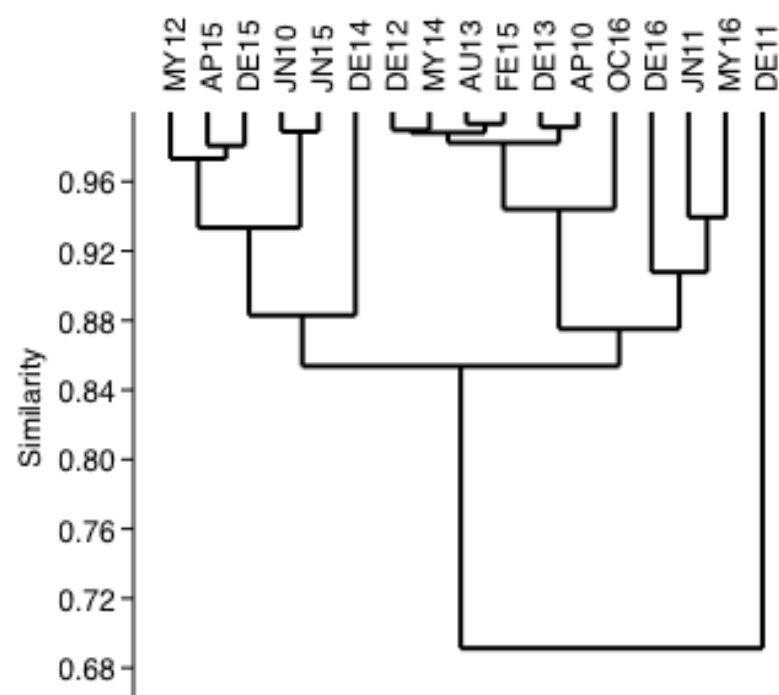

(b)

Figure 2

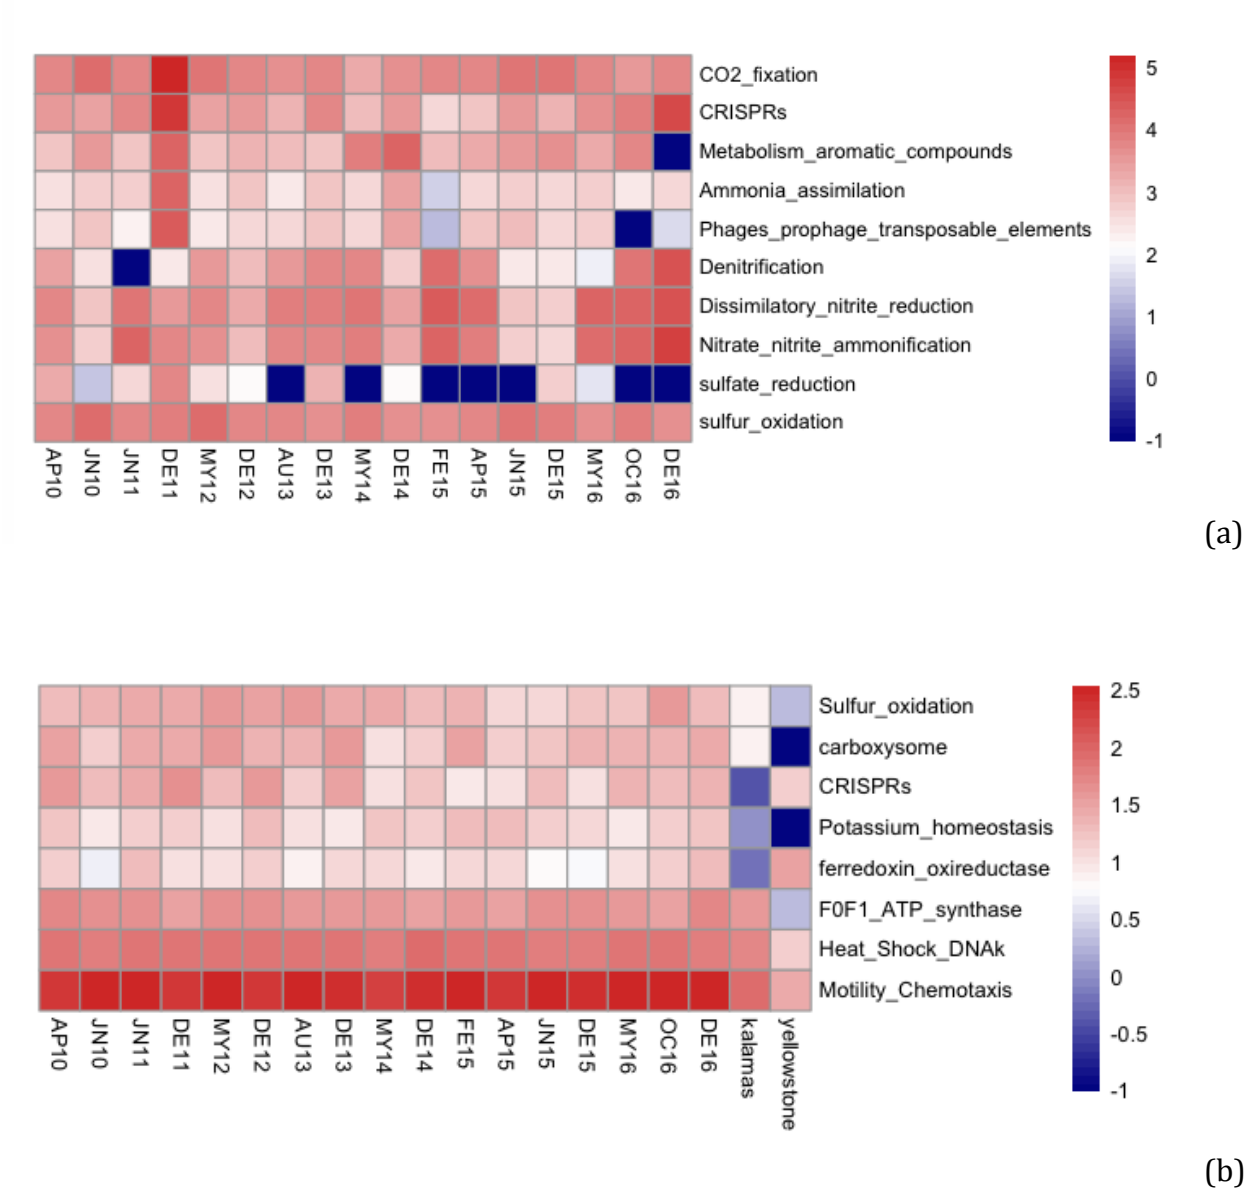

Figure 3

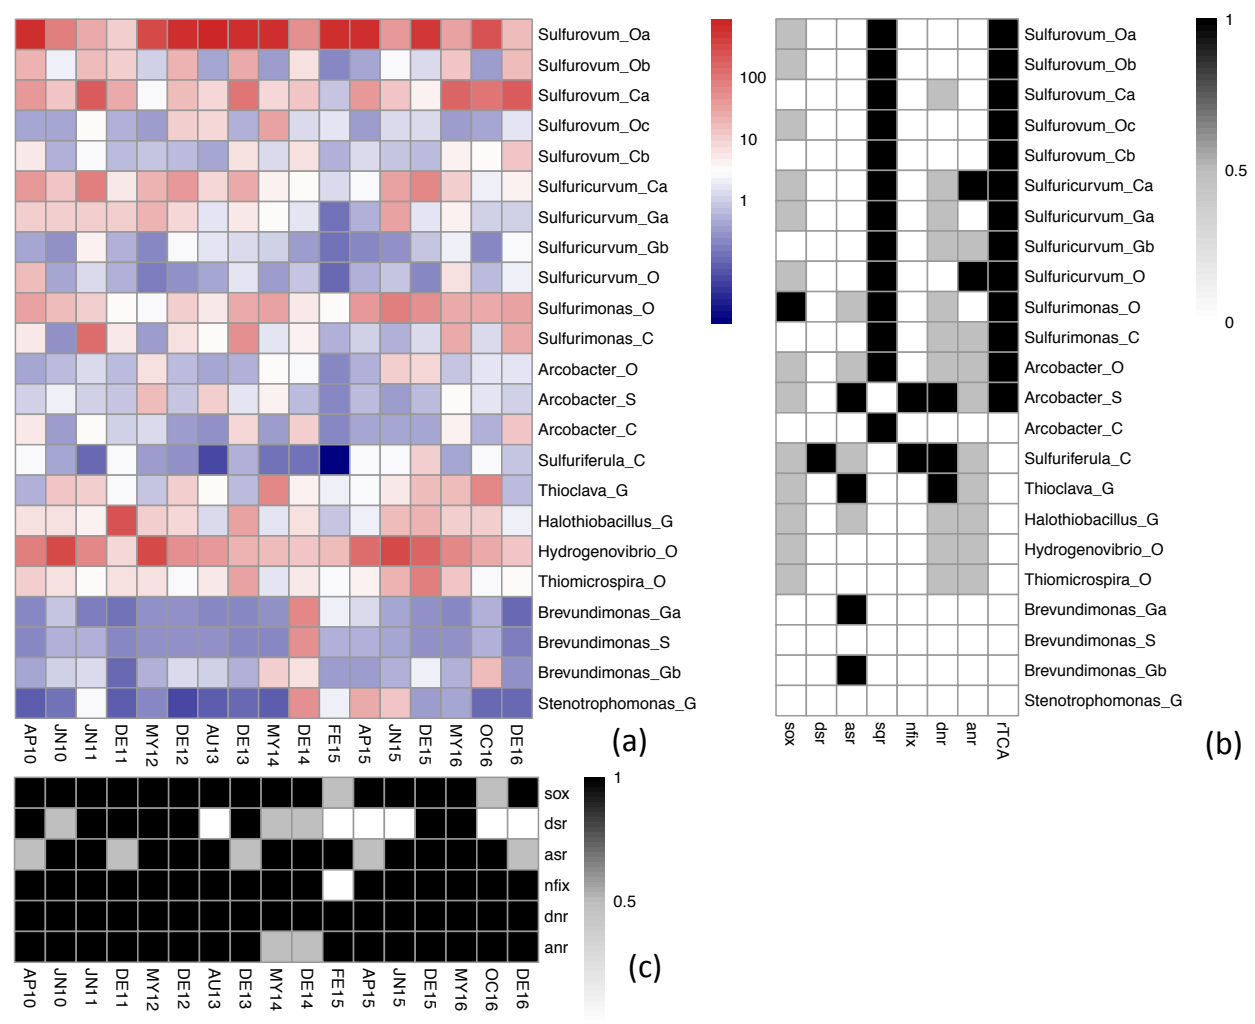

**Table 1. Metagenomic dataset statistics associated with Thermopyles dataset**

| <b>WGS dataset statistics</b> | <b>AP10</b> | <b>JN10</b> | <b>JN11</b> | <b>DE11</b> | <b>MY12</b> | <b>DE12</b> | <b>AU13</b> | <b>DE13</b> | <b>MY14</b> |
|-------------------------------|-------------|-------------|-------------|-------------|-------------|-------------|-------------|-------------|-------------|
| <b>Total size (Gb)</b>        | 3.47        | 3.31        | 3.54        | 2.24        | 2.37        | 3.17        | 3.02        | 3.84        | 2.82        |
| <b># predicted genes</b>      | 44,818      | 92,624      | 40,118      | 49,796      | 39,349      | 45,342      | 37,093      | 54,317      | 45,364      |
| <b># contigs</b>              | 12,590      | 23,409      | 9,720       | 17,517      | 11,372      | 11,625      | 11,178      | 16,985      | 10,063      |
| <b>Average contig length</b>  | 2,867       | 3,277       | 3,512       | 2,319       | 2,842       | 3,242       | 2,611       | 2,566       | 3,802       |
| <b>Longer contig (bp)</b>     | 186,023     | 250,868     | 138,677     | 104,928     | 186,610     | 239,545     | 204,647     | 240,475     | 240,302     |
| <b>Coverage (Nonpareil)</b>   | 0.85        | 0.77        | 0.92        | 0.84        | 0.81        | 0.86        | 0.88        | 0.85        | 0.93        |
| <b>N50</b>                    | 3,691       | 4,791       | 5,851       | 2,521       | 3,874       | 4,658       | 3,132       | 3,067       | 7,823       |

  

| <b>WGS dataset statistics</b> | <b>DE14</b> | <b>FE15</b> | <b>AP15</b> | <b>JN15</b> | <b>DE15</b> | <b>MY16</b> | <b>OC16</b> | <b>DE16</b> |
|-------------------------------|-------------|-------------|-------------|-------------|-------------|-------------|-------------|-------------|
| <b>Total size (Gb)</b>        | 3.35        | 1.70        | 3.34        | 3.24        | 3.28        | 4.11        | 2.71        | 3.48        |
| <b># predicted genes</b>      | 112,357     | 16,152      | 31,367      | 102,440     | 61,816      | 80,003      | 35,720      | 29,561      |
| <b># contigs</b>              | 21,625      | 4,931       | 8,295       | 24,137      | 14,613      | 22,072      | 8,128       | 8,011       |
| <b>Average contig length</b>  | 4,693       | 2,591       | 3,118       | 3,603       | 3,519       | 2,988       | 3,731       | 2,994       |
| <b>Longer contig (bp)</b>     | 260,721     | 240,237     | 229,951     | 269,767     | 240,362     | 240,890     | 691,025     | 164,877     |
| <b>Coverage (Nonpareil)</b>   | 0.86        | 0.95        | 0.85        | 0.88        | 0.92        | 0.87        | 0.94        | 0.93        |
| <b>N50</b>                    | 10,965      | 2,833       | 5,336       | 5,558       | 5,519       | 4,062       | 7,697       | 4,228       |

**Table 2. Taxonomic identification of MAGs and assembly statistics. Best taxonomic classification (p<0.1) and closest relative according to MiGA NCBIprok and GTDB-tk databases.**

| Sample | Bin | MAG name           | Taxonomy NCBI (p<0.10)                 | closest_relative NCBI (AAI)                                   | Taxonomy (GTDB-tk)           | closest_rel GTDB-tk | Completeness | Contamination | # genes | length (bp) | GC%   | N50     |
|--------|-----|--------------------|----------------------------------------|---------------------------------------------------------------|------------------------------|---------------------|--------------|---------------|---------|-------------|-------|---------|
| DE13   | 14  | Arcobacter_C       | <i>Epsilonproteobacteria</i> (Class)   | Arcobacter sp. L NC 017192 (47.14% AAI)                       | Campylobacteriales           | nd                  | 82.9         | 9.9           | 1637    | 1369554     | 34.74 | 3,397   |
| JN15   | 18  | Arcobacter_O       | Campylobacteriales (order)             | Arcobacter sp. L NC 017192 (55.41% AAI)                       | Campylobacteriales           | nd                  | 94.6         | 9             | 4141    | 3329994     | 33.02 | 5,788   |
| AU13   | 5   | Arcobacter_S       | <i>Arcobacter</i> sp. L (Species)      | Arcobacter sp. L NC 017192 (86.86% AAI)                       | Aliarcobacter sp002452       | GCA_002452915       | 84.7         | 9.9           | 3030    | 2361362     | 28.07 | 3,008   |
| DE14   | 2   | Brevundimonas_Ga   | <i>Brevundimonas</i> (genus)           | Brevundimonas diminuta NZ CP021995 (81.06% AAI)               | Brevundimonas diminuta       | GCA_002430835       | 75.7         | 1.8           | 3446    | 3497516     | 66.88 | 46,130  |
| OC16   | 6   | Brevundimonas_Gb   | <i>Brevundimonas</i> (genus)           | Brevundimonas sp. DS20 NZ CP012897 (83.75% AAI)               | Brevundimonas                | GCA_003248925.1     | 93.7         | 6.3           | 3844    | 3538981     | 68.25 | 34,665  |
| DE14   | 3   | Brevundimonas_S    | <i>Brevundimonas</i> diminuta          | Brevundimonas diminuta NZ CP021995(96.83)                     | Brevundimonas diminuta       | GCF_000204035       | 73           | 1.8           | 3439    | 3418976     | 67.76 | 51,630  |
| JN15   | 14  | Halothiobacillus_G | <i>Halothiobacillus</i> (Genus)        | Halothiobacillus neapolitanus c2 NC 013422T (89.46%)          | Halothiobacillus             | GCA_002282715       | 83.8         | 2.7           | 2684    | 2257048     | 56.06 | 4,350   |
| MY16   | 11  | Hydrogenovibrio_O  | Thiotrichales (Order)                  | Hydrogenovibrio crunogenus XCL 2 NC 007520 (63.68% AAI)       | Hydrogenovibrio              | GCF_000711315.1     | 89.2         | 0.9           | 2345    | 2140471     | 45.1  | 8,061   |
| AP15   | 6   | Stenotrophomonas_G | <i>Stenotrophomonas</i> (genus)        | Stenotrophomonas rhizophila NZ CP007597T (86.11% AAI)         | Stenotrophomonas maltophilia | GCF_002799095       | 86.5         | 0.9           | 3624    | 4049585     | 67.72 | 56,024  |
| DE12   | 3   | Sulfuricurvum_C    | <i>Epsilonproteobacteria</i> (Class)   | Sulfuricurvum kujiense DSM 16994 NC 014762T (55.21% AAI)      | Campylobacteriales           | nd                  | 88.3         | 4.5           | 2470    | 2195547     | 45.61 | 9,117   |
| JN15   | 6   | Sulfuricurvum_Ga   | <i>Sulfuricurvum</i> (Genus)           | Sulfuricurvum kujiense DSM 16994 NC 014762T (79.16% AAI)      | Sulfurimonadaceae            | nd                  | 91           | 2.7           | 1787    | 1533918     | 45.58 | 9,298   |
| DE16   | 5   | Sulfuricurvum_Gb   | <i>Sulfuricurvum</i> (Genus)           | Sulfuricurvum kujiense DSM 16994 NC 014762T (79.05% AAI)      | Sulfurimonadaceae            | GCA_002633015.1     | 92.8         | 2.7           | 1693    | 1500498     | 44.39 | 10,849  |
| AP10   | 10  | Sulfuricurvum_O    | Campylobacteriales (order)             | Sulfuricurvum kujiense DSM 16994 NC 014762T (55.56%)          | Sulfurimonadaceae            | nd                  | 72.1         | 0.9           | 1817    | 1606347     | 57.92 | 16,172  |
| DE15   | 11  | Sulfuriferula_C    | <i>Betaproteobacteria</i> (Class)      | Sulfuriferula sp. AH1 NZ CP021138 (53.45%)                    | Thiobacillus denitrificans   | GCA_002343685       | 95.5         | 8.1           | 4449    | 3975807     | 65.8  | 34,175  |
| MY16   | 8   | Sulfurimonas_C     | <i>Epsilonproteobacteria</i> (Class)   | Sulfurimonas autotrophica DSM 16294 NC 014506T (54.43% AAI)   | Sulfurimonadaceae            | GCA_002633015       | 84.7         | 1.8           | 1645    | 1460674     | 44.24 | 8,986   |
| MY14   | 6   | Sulfurimonas_O     | Campylobacteriales (order)             | Sulfurimonas autotrophica DSM 16294 NC 014506T (64.07% AAI)   | Sulfurimonadaceae            | nd                  | 91           | 7.2           | 2287    | 1993344     | 37.39 | 10,100  |
| DE12   | 5   | Sulfurovum_Ca      | <i>Epsilonproteobacteria</i> (Class)   | Sulfurovum sp. NBC37 1 NC 009663 (56.17% AAI)                 | Sulfurovaceae                | GCA_001493195       | 82           | 6.3           | 1913    | 1437704     | 34.37 | 3,088   |
| DE16   | 8   | Sulfurovum_Cb      | <i>Epsilonproteobacteria</i> (Class)   | Sulfurovum lithotrophicum NZ CP011308T (52.68% AAI)           | Campylobacteriales           | nd                  | 93.7         | 3.6           | 1914    | 1688626     | 33.98 | 11,871  |
| AP10   | 1   | Sulfurovum_Oa      | Campylobacteriales (order)             | Sulfurovum lithotrophicum NZ CP011308T (63.3% AAI)            | Sulfurovaceae                | GCA_002742845.1     | 92.8         | 4.5           | 1839    | 1765907     | 41.56 | 72,213  |
| AP10   | 8   | Sulfurovum_Ob      | Campylobacteriales (order)             | Sulfurovum lithotrophicum NZ CP011308T (56.37% AAI)           | Sulfurovaceae                | GCA_002311915.1     | 89.2         | 3.6           | 1861    | 1745349     | 42.47 | 7,244   |
| MY14   | 5   | Sulfurovum_Oc      | Campylobacteriales (order)             | Sulfurovum lithotrophicum NZ CP011308T (63.07% AAI)           | Sulfurovaceae                | GCF_001595645       | 93.7         | 1.8           | 2082    | 1968869     | 46.8  | 25,751  |
| JN11   | 13  | Thioclava_G        | <i>Thioclava</i> (Genus)               | Thioclava nitratireducens NZ CP019437T (82.65% AAI)           | Thioclava marina             | GCF_002020135       | 92.8         | 2.7           | 4007    | 3856190     | 64.05 | 19,975  |
| DE12   | 2   | Thiomicrospira_O   | Thiotrichales (Order)                  | Thiomicrospira aerophila AL3 NZ CP007030T (56.15% AAI)        | Thiomicrospiraceae           | GCF_000483485       | 84.7         | 0.9           | 2296    | 2067329     | 51.78 | 5,551   |
| AU13   | 4   |                    | Rhodobacteraceae (Family)              | Rhodobacter sp. LPB0142 NZ CP017781 (68.25% AAI)              |                              |                     | 73.9         | 2.7           | 3568    | 3413188     | 67.28 | 9,731   |
| AP15   | 5   |                    | Sphingomonadales (Order)               | Altererythrobacter mangrovi NZ CP022889T (62.74% AAI)         |                              |                     | 92.8         | 9.9           | 3601    | 3597969     | 65.04 | 45,746  |
| DE14   | 4   |                    | Micrococcales (order)                  | Cellulomonas fimi ATCC 484 NC 015514T (65.53% AAI)            |                              |                     | 90.1         | 2.7           | 3778    | 4066437     | 75.38 | 16,325  |
| DE14   | 9   |                    | Microbacterium (Genus)                 | Microbacterium aurum NZ CP018762(93.92)                       |                              |                     | 89.2         | 0.9           | 2757    | 2881951     | 70.61 | 44,540  |
| DE15   | 6   |                    | Rhodobacteriales (Order)               | Hyphomonas neptunium ATCC 15444 NC 008358T (61.45% AAI)       |                              |                     | 92.8         | 1.8           | 3514    | 3552243     | 61.4  | 68,082  |
| DE15   | 12  |                    | Micrococcales (order)                  | Phycococcus dokdonensis NZ LT629711T (61.57% AAI)             |                              |                     | 83.8         | 1.8           | 4173    | 3855105     | 73.5  | 8,018   |
| JN10   | 3   |                    | Rhodobacteriales (Order)               | Rhodobacter blasticus NZ CP020470 (62.39% AAI)                |                              |                     | 91.9         | 0.9           | 3413    | 3182379     | 70.24 | 8,962   |
| JN10   | 6   |                    | <i>Gammaproteobacteria</i> (Class)     | Gallaeimonas mangrovi NZ CP031416T (45.28% AAI)               |                              |                     | 95.5         | 0.9           | 2268    | 2169198     | 46.34 | 23,813  |
| JN10   | 7   |                    | <i>Rhizorhabdus</i> (Genus)            | Rhizorhabdus dicambivorans NZ CP023449(81.5)                  |                              |                     | 95.5         | 1.8           | 4109    | 4151982     | 65.25 | 68,680  |
| JN11   | 10  |                    | <i>Stenotrophomonas</i> (genus)        | Stenotrophomonas maltophilia NZ CP011305 (95.54)              |                              |                     | 95.5         | 1.8           | 4489    | 4891136     | 66.09 | 51,010  |
| JN15   | 4   |                    | Sphingobacteriales (Order)             | Pseudopedobacter saltans DSM 12145 NC 015177T (63.25% AAI)    |                              |                     | 95.5         | 0.9           | 3062    | 3278549     | 35.6  | 91,434  |
| JN15   | 10  |                    | <i>Sphingopyxis terrae</i> (Species)   | Sphingopyxis terrae subsp. terrae NBRC 15098 CP0133429(94.12) |                              |                     | 87.4         | 4.5           | 3293    | 3372237     | 65.39 | 83,053  |
| JN15   | 11  |                    | Sphingomonadales (Order)               | Altererythrobacter mangrovi NZ CP022889T (62.98% AAI)         |                              |                     | 73           | 0.9           | 3061    | 3068126     | 65.71 | 51,503  |
| JN15   | 15  |                    | <i>Sphingopyxis</i> (Genus)            | Sphingopyxis macrogoltabida NZ CP009429T (81.56% AAI)         |                              |                     | 79.3         | 3.6           | 3787    | 3833590     | 65.76 | 33,596  |
| JN15   | 21  |                    | Micrococcales (order)                  | Microbacterium chocolatum NZ CP015810 (66.76% AAI)            |                              |                     | 80.2         | 1.8           | 3430    | 2879452     | 66.83 | 4,351   |
| MY12   | 9   |                    | Moraxella osloensis (Species)          | Moraxella osloensis NZ AP017381 (95.4)                        |                              |                     | 89.2         | 6.3           | 2774    | 2538488     | 44.02 | 4,340   |
| MY14   | 4   |                    | Flavobacteriaceae (Family)             | Flavobacterium sediminis NZ CP029463T (74.85% AAI)            |                              |                     | 73.9         | 0.9           | 2497    | 2179174     | 30.65 | 7,369   |
| MY14   | 9   |                    | <i>Gammaproteobacteria</i> (Class)     | Aeromonas schubertii NZ CP013067 (46.72% AAI)                 |                              |                     | 88.3         | 2.7           | 2632    | 2499300     | 52.55 | 8,814   |
| OC16   | 5   |                    | <i>Pseudomonas balearica</i> (Species) | Pseudomonas balearica DSM 6083 NZ CP007511 (98.220)           |                              |                     | 94.6         | 1.8           | 4283    | 4536722     | 64.76 | 196,460 |
